**Title:** Disease and Economic Burden of Stillbirths in India in 2019

**Running Title:** India Stillbirth Burden

**Authors:** Sweta Dubey<sup>1,2</sup>, Vidhi Wadhvani<sup>1,3</sup>, Siddhesh Zadey<sup>1,4,5,6</sup>

**Affiliations:**

1. Association for Socially Applicable Research (ASAR), Pune, Maharashtra, India
2. Department of Pediatrics, SUNY Downstate Health Science University, Brooklyn New York USA
3. Gujarat Cancer Society Medical College, Hospital and Research Centre, Ahmedabad, Gujarat, India
4. Dr D. Y. Patil Medical College, Hospital, and Research Centre Pune, Dr. D. Y. Patil Vidyapeeth, Pune, Maharashtra, India
5. Global Emergency Medicine Innovation and Implementation (GEMINI) Research Center, Duke University School of Medicine, Durham North Carolina USA
6. Department of Epidemiology, Columbia University Mailman School of Public Health, New York City New York USA

**Corresponding Author:** Siddhesh Zadey BSMS, MScGH; ASAR Office Address: D2 Sai Heritage, New DP Road, Aundh, Pune, Maharashtra, India 411007; Email: [sidzadey@asarforindia.org](mailto:sidzadey@asarforindia.org); Ph. No.: +1-919-699-9557

**Article Type:** Brief Report

**Word Count:** 2127

**Data availability statement:** The data used and produced in the manuscript can be found on Harvard Dataverse at - <https://doi.org/10.7910/DVN/UVM051>.

**Funding statement:** No funding

**Conflict of interest disclosure:** Siddhesh Zadey (SZ) serves on the State Mental Health Policy Drafting Committee for Maharashtra, India, the Board of ASAR, and the Advisory Board of Nivarana. SZ is currently the Chair of G4 Alliance SOTA Care in South Asia Working Group and has received honoraria from Think Global Health, Harvard Public Health Magazine, and The Hindu for writing. Sweta Dubey serves on the Board of ASAR. Vidhi Wadhvani has no competing interests to disclose.

**Ethics approval statement:** Not applicable

**Patient consent statement:** Not applicable

**Permission to reproduce material from other sources:** Not applicable

## Synopsis

**Study Question:** This study estimates the disease and economic burden of stillbirth in India in 2019

**What's already known:** India has the highest absolute number of stillbirths. Despite the high burden and preventable nature, the stillbirth burden is not included in global or national estimates. No previous studies have looked at the disease burden of stillbirth. While previous studies have looked at the economic burden of stillbirth in the High-Income Countries, they present no value for India.

**What this study adds:** This study looks at the stillbirth disease burden in terms of disability-adjusted life-years (DALYs) and the percentage contribution of stillbirth to under-5 DALYs. The economic burden of stillbirth was calculated by the value of life-years (VLYs) approach. The disease burden of stillbirth was 18 million DALYs, with stillbirth contributing 22% to the total under-5 DALYs. The economic burden was NR 7.7 trillion (USD 109.38 billion) for India in 2019.

**Keywords:** Stillbirth, Disease burden, Health Economics, Public Health

## Abstract

**Background:** India has the highest absolute number of stillbirths worldwide. Despite the high burden and preventable nature, stillbirth is not high on the health agenda including the absence of stillbirths in the Global Burden of Disease (GBD) study estimates. We assessed the disease and economic burden of stillbirth in India.

**Methods:** In this retrospective analysis, the number of stillbirths, live births, and life expectancy was derived from the Health Management Information System (HMIS) 2019 for India and its 21 states. Additionally, values from the civil and sample registration systems were used for secondary analysis. Two stillbirth rates were calculated- still live birth rate (SLBR) using live births and still total birth rate (STBR) using total births i.e., live and stillbirths. We calculated stillbirth-adjusted life expectancy (SALE). For disease burden, measured by disability-adjusted life-years (DALYs), we multiplied live births with the absolute difference of SALE and live-birth life expectancy. We calculated the stillbirth contribution of under-5 DALYs derived from GBD 2019. Economic burden was calculated under the value of life-year (VLY) approach by multiplying stillbirth DALYs with per capita domestic product. Three values were calculated based on different domestic product values from the Reserve Bank of India and National Health Accounts data for 2019.

**Results:** As per HMIS, India had 263342 stillbirths. Nationally, the SLBR and STBR were 12.4 and 12.25, respectively. Stillbirths decreased the overall life expectancy at birth by 0.85 years. Stillbirths contributed to 18.1 million DALYs and the economic burden was INR 7.7 trillion in 2019. Stillbirths contributed 22% to under-5 DALYs. Eight states (30.9%) contribute to more than 50% of disease and economic burden.

**Conclusion:** These findings suggest a high disease and economic burden of stillbirth in India with across-state variations. Incorporating burden metrics in child health policies could improve resource allocation.

## 1 Background

The World Health Organization (WHO) defines a stillborn as a baby who dies after 28 weeks of pregnancy but before or during birth.<sup>1</sup> In several countries, stillbirths equal neonatal mortality in absolute count. The majority of stillbirths can be averted by improving family planning, antenatal care, and obstetric care. While the pediatric disease burden is high on the global agenda stillbirths are often neglected. One depiction of neglect is the absence of stillbirths in the Global Burden of Disease (GBD)<sup>2</sup> study estimates.

In part, the neglect is due to the methodological challenges in ideating and estimating the disability-adjusted life-years (DALYs) for a condition that involves “pre-birth” mortality. However, recently, Kant has suggested a framework for calculating stillbirth DALYs.<sup>3</sup> Briefly, this framework defines stillbirth mortality in line with neonatal mortality, i.e., using live births instead of total births as the denominator. Next, this still-live birth rate is used to adjust the population-level life expectancy. Finally, stillbirth-adjusted life expectancy is used to calculate stillbirth DALYs. Investigating stillbirth disease burden beyond mortality can help assess the overall toll of the problem. Additionally, it also ensures the inclusion of stillbirth in the disease burden discourse which is growing in popularity for policymaking and health investments.

Investments in health often have to rely on evidence that depicts the disease's economic burden. There are multiple ways to capture such a burden. Previously, cost-of-illness assessments that investigate direct and indirect costs have noted that stillbirths can cost families anywhere between 10% and 70% greater than a live birth.<sup>4</sup> However, the economic burden of stillbirth is often underestimated and the literature is scant.<sup>5</sup> Another approach to comprehensively assess economic burden is known as the value of life-year (VLY) or full-income approach.<sup>6</sup> The VLY approach uses improvements in gross domestic product and life expectancy to depict the overall impact of healthcare improvements on populations. For a South Asian country, it has been estimated that the value of a life-year is 2.8 times the GDP per capita.

As per the 2020 United Nations report, India contributes to 18% of global stillbirth mortality and has the highest absolute number of such deaths of any country.<sup>7</sup> In response, the country has launched the Indian Newborn Action Plan (INAP) which aims to reduce the stillbirth rate to a single-digit value by 2030.<sup>8</sup> However, INAP does not look into the stillbirth disease burden and there are no such assessments for India and its states. This work has two main aims. First, we estimate the disease burden of stillbirths measured by DALYs for India and its 36 states and union territories (UTs). Second, based on the DALY values, we estimate the economic burden using the VLY approach. These findings are useful for integrating stillbirth into the health agenda and for advocating for investments in stillbirth prevention based on potential economic losses.

## 2 Materials and Methods

We calculated the stillbirth rate, stillbirth-adjusted life expectancy (SALE), and disease burden of stillbirths measured by DALYs based on the framework proposed by Kant.<sup>3</sup> Two stillbirth rates were calculated. Still live birth rate (SLBR) used live births (LB) as the denominator for rate calculation (**Equation 1**) while still total birth rate (STBR) used total births (TB) i.e., the sum of stillbirth and live birth (TB= SB + LB) as the denominator (**Equation 2**).

$$SLBR = \frac{SB}{LB} * 1000 \quad (Eq. 1)$$

$$\text{Still Total Birth Rate (STBR)} = \frac{SB}{SB + LB (= TB)} * 1000 \quad (Eq. 2)$$

Typically, life expectancy calculations are based on only live births. Hence, Kant proposes that just as SLBR and STBR are different entities, life expectancies (LE) calculated using live and total births are different entities too - life expectancy of live births (LELB) and life expectancy of total births (LETB). LETB is essentially stillbirth-adjusted life expectancy (SALE) which can be given by (**Equation 3**).

$$SALE = LETB = \frac{LELB * 1000}{1000 + SLBR} \quad (Eq. 3)$$

Disability-adjusted life-years (DALYs) are typically used for assessing disease burden. DALYs rely on years of life lost due to premature mortality calculated by multiplying the number of premature deaths by the life expectancy (i.e., LELB). Since the life expectancy for SB is zero, DALYs cannot be obtained from this method. So, Kant suggested stillbirth DALYs be calculated as the absolute difference in life expectancy of live births and stillbirth-adjusted life expectancy multiplied by the number of live births (**Equation 4**).

$$DALY \text{ for SB} = YLL \text{ for SB} = |LELB - SALE| * LB \quad (Eq. 4)$$

For the current analysis, the reported values for live and total births were extracted from the Health Management Information System (HMIS) for India and its 21 states and UTs for the financial year 2019-20.<sup>2</sup> Additionally, DALYs were also calculated for Sample Registration System (SRS)<sup>9</sup> (using STBR data) and Civil Registration System (CRS)<sup>10</sup> (using stillbirth count) for comparison across data sources for 21 states for financial year 2019.

Additionally, since the disease burden of stillbirths is not separately mentioned in data sources, the contribution of SB to the overall disease burden of childhood illnesses goes unnoticed. So, to estimate how much stillbirths contribute to the under-5 disease burden, we calculated the percentage of stillbirth DALYs of the reported under-5 DALYs as per **Equation 5**. Primarily, the stillbirth DALYs were calculated as per the HMIS data and under-5 DALYs were extracted from

the Global Burden of Disease (GBD)<sup>2</sup> data for 21 states for 2019. Additional values were also calculated based on the stillbirth DALYs derived by CRS and SRS data.

$$\begin{aligned} & \text{Percentage contribution of stillbirth to under - 5 DALY} \\ & = \frac{SB \text{ DALY}}{\text{Under - 5 DALY}} * 100 \text{ (Eq. 5)} \end{aligned}$$

Further, to assess the economic burden of stillbirth, we adapted the value of life-year (VLYs) approach that assigns a monetary value to each life-year. VLY considers the gains in gross domestic product and population-level life expectancy in the past decades due to public health interventions. The Lancet Commission on Investing in Health has noted that the levels of gains vary across World Bank regions.<sup>6</sup> For South Asia, the value of one life-year is equivalent to 2.8 times the per capita GDP at a 3% discount rate. Hence, the economic burden of stillbirth was quantified using **Equation 6**.

$$\text{Economic Burden (VLYs)} = 2.8 * \text{Domestic product per capita} * \text{DALYs (Eq. 6)}$$

In the current analysis, three VLY values were calculated for India and its 21 states and union territories based on three different values for per capita domestic product values. First, per capita gross domestic product (GDP). Second, per capita net domestic product (NDP), which is the net value of all goods and services produced in a region. Third, non-health gross domestic product (NHGDP) is the most conservative measure as it is the per capita GDP minus the per capita health expenditure of the region.

The values for GDP and NDP for India and its 21 states and union territories were extracted from the Reserve Bank of India (RBI) Handbook of Indian Statistics 2019-20 and values for per capita health expenditure were extracted from National Health Accounts (NHA) for the financial year 2019-20.<sup>11,12</sup> All monetary values are expressed in Indian national rupees (INR) for the year 2019 and were converted to USD based on an exchange rate of 1 USD = 70.394 INR.<sup>13</sup>

### 3 Results

As per the 2019 HMIS data, the reported number of stillbirths in India was 263342. The highest number of stillbirths was reported in Uttar Pradesh (45556) and the lowest in Lakshadweep (5). The SLBR and STBR for India were 12.4 and 12.25, respectively. Chandigarh had the highest registered SLBR (22.46) and STBR (21.96) While Kerala had the lowest SLBR (3.68) and STBR (3.67). On adjusting, stillbirths decreased the national life expectancy by 0.85 years. The impact of stillbirths on LE was highest in Odisha (1.5 years reduction) and lowest in Kerala (0.27 years reduction).

Nationally, stillbirth contributed to 18.1 million DALYs in 2019. Uttar Pradesh had 2.9 million DALYs while Himachal Pradesh had about 70,000 DALYs (**Figure 1**) It is noted that the top 10

states (Uttar Pradesh, Rajasthan, Bihar, Madhya Pradesh, West Bengal, Maharashtra, Odisha, Gujarat, Assam, and Jharkhand) with highest disease burden of stillbirths contribute to 76.33% of total DALYs as per HMIS. Additionally, DALYs varied from 0 in Telangana to 813,655.43 in Madhya Pradesh according to SRS (**eFigure 1**) and 20,407 in Himachal Pradesh to 2.38 million in Uttar Pradesh according to CRS (**eFigure 2**). Further, stillbirth contributed 22% to the total under-5 DALY. This proportion varied from 57.99% in Delhi to 12.31% in Rajasthan (**Figure 2**).

Nationally, the annual economic burden of stillbirth in 2019 was INR 7.7 trillion (USD 109.38 billion) using gross domestic product. This was equivalent to 3.7% of India's 2019 GDP. The economic burden varied from INR 680 billion per capita in Maharashtra to INR 44 billion per capita in Himachal Pradesh based on GDP calculations (**Figure 3**). The top ten states (Maharashtra, Uttar Pradesh, Rajasthan, Gujarat, Madhya Pradesh, West Bengal, Delhi, Karnataka, Haryana, and Odisha) with highest economic burden (based on GDP) account for 71.43% of national burden. Himachal Pradesh had the lowest economic burden based on gross, net, and non-health domestic product calculations (**Figure 3, eFigures 3&4**). Maharashtra had the highest economic burden based on gross and net domestic product values (**Figure 3 and eFigure 3**), while Rajasthan had the highest economic burden for stillbirths based on non-health domestic product calculations (**eFigure 4**).

## **4 Comment**

### ***4.1 Principal findings***

The disease and economic burden of stillbirth was 18 million DALYs and INR 7.7 trillion (USD 109.38 billion), respectively, for India in 2019. There was interstate variation with eight (30.09%) states contributing to over half the burden. Stillbirth contributed to 12.31-57.99% of the overall under-5 disease burden across states.

### ***4.2 Strengths***

To our knowledge, no previous studies have looked at the disease burden of stillbirth in DALY terms for India. We present subnational or state-level estimates that depict within-country variations. The economic burden is based on the value of the life-year approach that allows for comprehensive estimation compared to the traditional human capital approach. We present multiple estimates for economic burden based on different domestic product assumptions. Our analysis presents burden estimates for different stillbirth rates across multiple data sources.

### ***4.3 Limitations***

The data for life expectancy for live births (LELB) was derived from SRS, which only included data on 21 states. Hence, we were unable to include 15 states in the subnational analysis. Uncertainty analysis was also not performed for DALY or VLY calculations. Our primary estimates are based on HMIS and hence subject to data completeness, coverage, and other quality issues faced by the data source.<sup>14</sup>



#### **4.4 Interpretation**

The disease burden for stillbirth was 18.1 million DALYs and stillbirths contributed 22% to the total under-5 DALYs. To our knowledge, there have been no previous studies estimating the disease burden associated with stillbirth at the global or national level.

Previous work has focused on assessing the economic burden of stillbirths in high-income countries (HICs).<sup>4</sup> However, the study presents no value for India. The study encompasses a review of four studies based in the United Kingdom, the United States, and Australia. The studies included in this review used cost of illness and modelling approaches with only one study revealing mean indirect costs. This study noted the total mean cost per stillbirth as \$311944. Our analysis using HMIS data noted 263342 stillbirths in 2019 bringing the per stillbirth value to \$415429. It is important to go beyond the direct costing approaches to comprehensively understand the economic burden of stillbirth from a societal perspective.

We primarily used HMIS data for the calculation of the stillbirth rate, disease, and economic burden. Previous studies have noted the potential undercounting of stillbirths in SRS estimates. This undercounting is possibly attributed to misclassification of stillbirth under categories such as miscarriages or abortions and related stigma.<sup>15</sup> Hence, we opted not to use SRS and CRS data for primary analysis. Further, HMIS has previously been used for stillbirth rate estimation across districts and is gaining popularity as a source for research and policymaking.<sup>16</sup>

The high burden of stillbirth can be attributed to a lack of recognition at policy and community levels.<sup>17</sup> Tracking disease and economic burden along with rates can highlight the true magnitude of the problem. Analyzing interstate variation and incorporating stillbirth burden metrics in child health policies such as INAP could improve resource allocation toward the problem.

#### **5 Conclusion**

India has a large burden of stillbirth. Measuring and tracking stillbirth disease and economic burden will represent the true impact of stillbirths on society and help improve investments toward stillbirth reduction as a global public health issue.

#### **6 Acknowledgements**

None

## 7 References

1. United Nations Inter-agency Group for Child Mortality Estimation (UN IGME). Never Forgotten: The situation of stillbirth around the globe [Internet]. New York USA: United Nations Children's Fund (UNICEF); 2023 [cited 2023 Oct 15]. Available from: <https://data.unicef.org/resources/never-forgotten-stillbirth-estimates-report/>
2. Health Management Information System, Ministry of Health and Family Welfare. Performance of Key Health Management Information System (HMIS) Indicators across District (2017-18 to 2019-20) [Internet]. National Data and Analytics Platform. 2022 [cited 2023 Jun 9]. Available from: <https://ndap.niti.gov.in/dataset/7068>
3. Kant C. Stillbirths: how should its rate be reported, its disability-adjusted-life-years (DALY), and stillbirths adjusted life expectancy. *BMC Med Inform Decis Mak*. 2019 Jul 16;19(1):133.
4. Veettil SK, Kategeaw W, Hejazi A, Workalemahu T, Rothwell E, Silver RM, et al. The economic burden associated with stillbirth: A systematic review. *Birth*. 2023 Jun;50(2):300–9.
5. Heazell AEP, Siassakos D, Blencowe H, Burden C, Bhutta ZA, Cacciatore J, et al. Stillbirths: economic and psychosocial consequences. *Lancet*. 2016 Feb 6;387(10018):604–16.
6. Jamison DT, Summers LH, Alleyne G, Arrow KJ, Berkley S, Binagwaho A, et al. Global health 2035: a world converging within a generation. *Lancet*. 2013 Dec 7;382(9908):1898–955.
7. United Nations Inter-agency Group for Child Mortality Estimation (UN IGME). A Neglected Tragedy: The global burden of stillbirths [Internet]. New York: United Nations Children's Fund; 2020 [cited 2022 Oct 26]. Available from: <https://childmortality.org/wp-content/uploads/2020/10/UN-IGME-2020-Stillbirth-Report.pdf>
8. Child Health Division, Ministry of Health and Family Welfare, Government of India. India Newborn Action Plan [Internet]. New Delhi, India: Ministry of Health and Family Welfare, Government of India; 2014 [cited 2022 Oct 26]. Available from: <https://nhm.gov.in/images/pdf/programmes/inap-final.pdf>
9. Office of the Registrar General & Census Commissioner, India. Sample Registration System Statistical Report 2019 [Internet]. New Delhi, India: Ministry of Home Affairs, Government of India; 2022 [cited 2023 Oct 15]. Available from: <https://censusindia.gov.in/nada/index.php/catalog/42686>
10. Office of the Registrar General, India. Vital Statistics of India Based on the Civil Registration System 2019. New Delhi, India: Ministry of Home Affairs, Government of India; 2021.

11. Department of Statistics and Information Management. Handbook of Statistics on the Indian Economy 2019-20. Reserve Bank of India; 2020 Sep.
12. National Health Systems Resource Centre. National Health Accounts Estimates for India (2019). New Delhi: Ministry of Health and Family Welfare; 2023 Mar.
13. Internal Revenue Service. Yearly Average Currency Exchange Rates [Internet]. 2023 [cited 2023 Oct 11]. Available from: <https://www.irs.gov/individuals/international-taxpayers/yearly-average-currency-exchange-rates>
14. Zadey S, Dubey S, Wadhvani V. Data considerations in measuring stillbirths in India. *The Lancet Regional Health - Southeast Asia*. 2023 Sep;100282.
15. Dandona R, George S, Majumder M, Akbar M, Kumar GA. Stillbirth undercount in the sample registration system and national family health survey, India. *Bull World Health Organ*. 2023 Mar 1;101(3):191–201.
16. GBD 2015 Child Mortality Collaborators. Global, regional, national, and selected subnational levels of stillbirths, neonatal, infant, and under-5 mortality, 1980-2015: a systematic analysis for the Global Burden of Disease Study 2015. *Lancet*. 2016 Oct 8;388(10053):1725–74.
17. Roy MP. Mitigating the stillbirth challenge in India. *Lancet*. 2016 May 14;387(10032):1995.

## Figure Legends

**Figure 1:** State-wise disease burden of stillbirth for India in 2019 as per the Health Management Information System (HMIS).

**Figure 2:** Contribution of stillbirth to under-5 disability-adjusted life years in 2019.

**Figure 3:** State-wise economic burden (VLY based on per capita GDP) of stillbirth for India in 2019 as per the Health Management Information System (HMIS).

## eFigure Legends

**eFigure 1:** State-wise disease burden of stillbirth for India as per Sample Registration System (SRS).

**eFigure 2:** State-wise disease burden of stillbirth for India as per Civil Registration System (CRS).

**eFigure 3:** State-wise economic burden (VLY based on per capita NDP) of stillbirth for India in 2019 as per the Health Management Information System (HMIS).

**eFigure 4:** State-wise economic burden (VLY based on per capita non-health GDP) of stillbirth for India in 2019 as per the Health Management Information System (HMIS).

### Disability-Adjusted Life-Years (DALYs)

< 552.39K   552.39K–1.03M   1.03M–1.51M   1.51M–1.99M   1.99M–2.47M   ≥ 2.47M

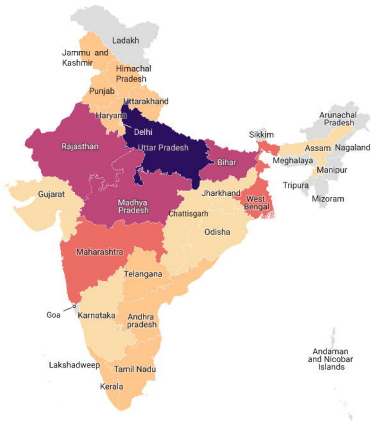

### Percentage

< 21.45    21.45–30.59    30.59–39.72    39.72–48.86    ≥ 48.86

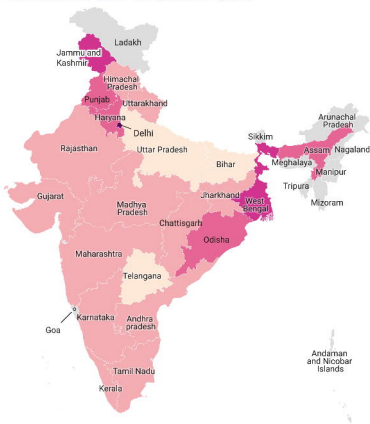

Value of Life-Years (VLYs)

< 171.17B   171.17B–297.67B   297.67B–424.17B   424.17B–550.68B   ≥ 550.68B

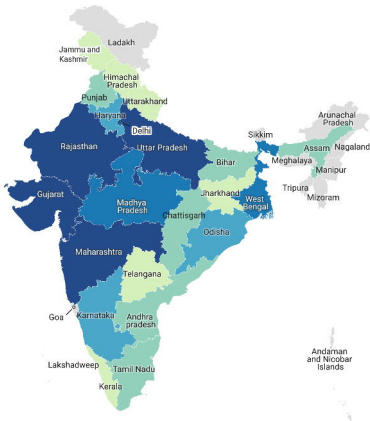

Source: https://medrxiv.org/content/10.1101/2023.10.16.23297071.full.pdf
